# Supplementary material
Source: Springer Nature journal article supplement (https://www.springermedizin.de/resource/supplementary/12890_2013_540_MOESM2_ESM.pdf/9505706)

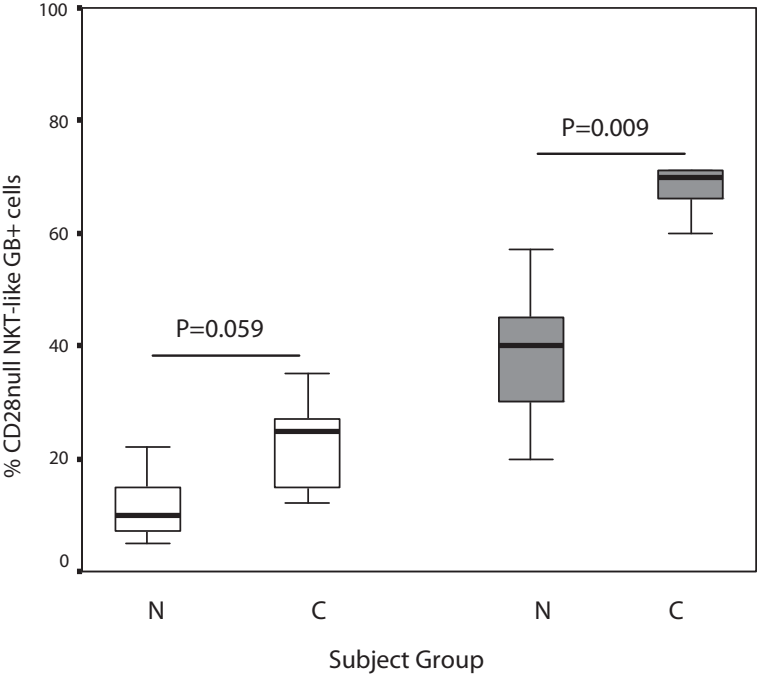

% CD28null NKT-like GB+ cells

P=0.009

P=0.059

N

C

N

C

Subject Group

Supplement: MOESM2 [file 9505706]
